# Supplementary material for: Efficacy of educational video game versus traditional educational apps at improving physician decision making in trauma triage: randomized controlled trial
Source: PubMed Central journal article supplement — BMJ. 2017 Dec 13;359:j5416. doi: 10.1136/bmj.j5416 (PMC5725983; doi:10.1136/bmj.j5416), 2017-12-13
Supplement: mohd039847.ww1.pdf [file mohd039847.ww1.pdf]

**APPENDIX:** Supplementary information [posted as supplied by author]

**Table A.** Description of cases included on virtual simulation administered during initial trial with disposition decisions by group.

| Case Description                                                                                                                                                                                    | Class of case                              | Disposition Decision*           | Game (n=148)      | Educational Program (n=149) |
|-----------------------------------------------------------------------------------------------------------------------------------------------------------------------------------------------------|--------------------------------------------|---------------------------------|-------------------|-----------------------------|
| 65 year old female s/p MVC with aortic transection, bilateral lower extremity fractures. Patient presents with hypotension and arrests if not resuscitated within 5 minutes (game time) of arrival. | Severely injured – representative case     | Admit<br>Died in ED<br>Transfer | 23%<br>51%<br>26% | 28%<br>54%<br>18%           |
| 36 year old male s/p GSW to abdomen with liver laceration.                                                                                                                                          | Severely injured – representative case     | Admit<br>Transfer               | 68%<br>33%        | 70%<br>30%                  |
| 80 year old female s/p ground level fall with multiple rib fractures                                                                                                                                | Severely injured – non-representative case | Admit<br>Discharge<br>Transfer  | 60%<br>5%<br>35%  | 76%<br>10%<br>14%           |
| 70 year old male s/p fall down steps with pelvic fracture and intra-parenchymal hemorrhage                                                                                                          | Severely injured – non-representative case | Admit<br>Discharge<br>Transfer  | 53%<br>1%<br>46%  | 74%<br>--<br>26%            |
| 18 year old female s/p bicycle collision with closed humerus fracture                                                                                                                               | Minimally injured                          | Admit<br>Discharge<br>Transfer  | 77%<br>17%<br>6%  | 78%<br>17%<br>5%            |
| 81 year old male s/p MVC with no injuries but NSTEMI                                                                                                                                                | Minimally injured                          | Admit<br>Discharge<br>Transfer  | 91%<br>1%<br>8%   | 96%<br>1%<br>3%             |
| 18 year old female with appendicitis                                                                                                                                                                | Non-trauma case – Low cognitive load       | Admit<br>Discharge              | 93%<br>7%         | 90%<br>10%                  |
| 42 year old female with cellulitis of arm                                                                                                                                                           | Non-trauma case – Low cognitive load       | Admit<br>Discharge<br>Transfer  | 72%<br>27%<br>1%  | 66%<br>34%<br>--            |
| 60 year old male with musculoskeletal chest pain                                                                                                                                                    | Non-trauma case – Low cognitive load       | Admit<br>Discharge              | 51%<br>48%        | 59%<br>41%                  |
| 36 year old male seeking opiates                                                                                                                                                                    | Non-trauma case – Low cognitive load       | Admit<br>Discharge              | 3%<br>97%         | 7%<br>93%                   |
| 60 year old female with subarchnoid hemorrhage and hypertensive emergency                                                                                                                           | Non-trauma case – High cognitive load      | Admit<br>Discharge<br>Transfer  | 72%<br>2%<br>26%  | 84%<br>4%<br>12%            |
| 46 year old female with sepsis.                                                                                                                                                                     | Non-trauma case – High cognitive load      | Admit<br>Transfer               | 22%<br>78%        | 36%<br>64%                  |
| 83 year old male with CHF exacerbation and respiratory failure. Patient arrests and dies if not intubated (or started on non-invasive ventilation) within 5 minutes of arrival (game time).         | Non-trauma case – High cognitive load      | Admit<br>Died in ED<br>Transfer | 47%<br>48%<br>5%  | 60%<br>40%<br>--            |
| 69 year old female with GI bleeding and hemorrhagic shock. Patient arrests and dies if not resuscitated with fluid and blood within 5 minutes (game time) of arrival.                               | Non-trauma case – High cognitive load      | Admit<br>Transfer               | 32%<br>68%        | 32%<br>69%                  |

**Guidelines for coding the simulation:**

1. We classified severely injured trauma patients as appropriately transferred if he/she either: a) died in the ED OR b) was transferred to a trauma center.
2. We classified severely injured trauma patients as under-triaged if he/she was admitted or discharged from the ED.

**Table B.** Description of cases included on virtual simulation administered during follow-up study with disposition decisions by group.

| Case Description                                                                                                                                                                                                                        | Class of case                              | Disposition Decision* | Game n=64 | Educational Program (n=59) |
|-----------------------------------------------------------------------------------------------------------------------------------------------------------------------------------------------------------------------------------------|--------------------------------------------|-----------------------|-----------|----------------------------|
| 23 year old female s/p fall off balcony who arrives seizing secondary to an epidural hematoma. If she is not intubated or does not receive anti-epileptics within five minutes of arrival (game time) she aspirates, arrests, and dies. | Severely injured – representative case     | Admit                 | 31%       | 48%                        |
|                                                                                                                                                                                                                                         |                                            | Died in ED            | 46%       | 42%                        |
|                                                                                                                                                                                                                                         |                                            | Transfer              | 23%       | 10%                        |
| 58 year old male s/p motorcycle collision. Arrives in hemorrhagic shock secondary to an open book pelvic fracture. and arrests without resuscitation.                                                                                   | Severely injured – representative case     | Admit                 | 44%       | 80%                        |
|                                                                                                                                                                                                                                         |                                            | Transfer              | 48%       | 20%                        |
|                                                                                                                                                                                                                                         |                                            | Died in ED            | 8%        | --                         |
| 80 year old male struck by a car. Arrives confused and short of breath. Patient has a subdural hematoma and multiple rib fractures.                                                                                                     | Severely injured – non-representative case | Admit                 | 53%       | 68%                        |
|                                                                                                                                                                                                                                         |                                            | Discharge             | --        | 2%                         |
|                                                                                                                                                                                                                                         |                                            | Transfer              | 44%       | 20%                        |
|                                                                                                                                                                                                                                         |                                            | Morgue                | 3%        | 3%                         |
| 70 year old male s/p fall with an open (1cm) tib-fib fracture                                                                                                                                                                           | Severely injured – non-representative case | Admit                 | 72%       | 75%                        |
|                                                                                                                                                                                                                                         |                                            | Discharge             | 21%       | 25%                        |
|                                                                                                                                                                                                                                         |                                            | Transfer              | 7%        | --                         |
| 45 year old male tackled in football practice. Presents with a concussion                                                                                                                                                               | Minimally injured                          | Admit                 | --        | 14%                        |
|                                                                                                                                                                                                                                         |                                            | Discharge             | 92%       | 86%                        |
|                                                                                                                                                                                                                                         |                                            | Transfer              | 8%        | 10%                        |
| 65 year old female s/p motorcycle collision. Arrives inebriated and confused, but without injuries                                                                                                                                      | Minimally injured                          | Admit                 | 70%       | 79%                        |
|                                                                                                                                                                                                                                         |                                            | Discharge             | 7%        | 10%                        |
|                                                                                                                                                                                                                                         |                                            | Transfer              | 22%       | 10%                        |
| 60 year old female with subarchnoid hemorrhage and hypertensive emergency                                                                                                                                                               | Non-trauma case – High cognitive load      | Admit                 | 80%       | 90%                        |
|                                                                                                                                                                                                                                         |                                            | Discharge             | 3%        | 6%                         |
|                                                                                                                                                                                                                                         |                                            | Transfer              | 17%       | 3%                         |
| 46 year old female with sepsis.                                                                                                                                                                                                         | Non-trauma case – High cognitive load      | Admit                 | 18%       | 18%                        |
|                                                                                                                                                                                                                                         |                                            | Transfer              | 82%       | 82%                        |
| 83 year old male with CHF exacerbation and respiratory failure. Patient arrests and dies if not intubated (or started on non-invasive ventilation) within 5 minutes of arrival (game time).                                             | Non-trauma case – High cognitive load      | Admit                 | 52%       | 67%                        |
|                                                                                                                                                                                                                                         |                                            | Died in ED            | 48%       | 33%                        |
| 69 year old female with GI bleeding and hemorrhagic shock. Patient arrests and dies if not resuscitated with fluid and blood within 5 minutes (game time) of arrival.                                                                   | Non-trauma case – High cognitive load      | Admit                 | 23%       | 42%                        |
|                                                                                                                                                                                                                                         |                                            | Transfer              | 77%       | 58%                        |
